1 **Human-like telomeres in *Zostera marina* reveal a mode of transition from the plant to the**  
2 **human telomeric sequences**

3 Vratislav Peska<sup>1†\*</sup>, Martin Mátl<sup>2†</sup>, Terezie Mandáková<sup>2,3</sup>, Daniel Viales<sup>4</sup>, Petr Fajkus<sup>1,2</sup>, Jiří  
4 Fajkus<sup>1,2,5</sup>, Sònia Garcia<sup>4\*</sup>

5 <sup>1</sup>Department of Cell Biology and Radiobiology, Institute of Biophysics of the Czech Academy of  
6 Sciences, Brno CZ-61265, Czech Republic.

7 <sup>2</sup>Mendel Centre for Plant Genomics and Proteomics, CEITEC, Masaryk University, Brno CZ-  
8 62500, Czech Republic.

9 <sup>3</sup>Laboratory of Plant Molecular Genetics, Department of Experimental Biology, Faculty of  
10 Science, Masaryk University, Brno CZ-61137, Czech Republic.

11 <sup>4</sup>Institut Botànic de Barcelona (IBB, CSIC-Ajuntament de Barcelona), Passeig del Migdia s/n,  
12 Barcelona 08038, Catalonia, Spain.

13 <sup>5</sup>Laboratory of Functional Genomics and Proteomics, NCBR, Faculty of Science, Masaryk  
14 University, Brno CZ-61137, Czech Republic.

15 †Joint first authors.

16 \*Joint corresponding authors: [soniagarcia@ibb.csic.es](mailto:soniagarcia@ibb.csic.es), [vpeska@ibp.cz](mailto:vpeska@ibp.cz).

17

18

19 **Abstract**

20 A previous study describing the genome of *Zostera marina*, the most widespread seagrass in  
21 the Northern hemisphere, revealed some genomic signatures of adaptation to the aquatic  
22 environment. Important features related to the ‘back-to-the-sea’ reverse evolutionary  
23 pathway were found, such as the loss of stomatal genes, while other functions like an algal-like  
24 cell wall composition were acquired. Beyond these, the genome structure and organization  
25 were comparable to the majority of plant genomes sequenced, except for one striking feature  
26 that went unnoticed at that time: the presence of human-like instead of the expected plant-  
27 type telomeric sequences. By using different experimental approaches including FISH, NGS and  
28 Bal31 analysis, we have confirmed its telomeric location in the chromosomes of *Z. marina*. We  
29 have also identified its telomerase RNA subunit (TR), confirming the presence of the human-  
30 type telomeric sequence in the template region. Remarkably, this region was found to be very  
31 variable even in clades with a highly conserved telomeric sequence across their species. Based  
32 on this observation, we propose that alternative annealing preferences in the template  
33 borders can explain the transition between the plant and human telomeric sequences. The  
34 further identification of paralogues of TR in several plant genomes brought us to the  
35 hypothesis that plants may keep an increased ability to change their telomeric sequence. We  
36 discuss the implications of this occurrence in the evolution of telomeres while introducing a  
37 mechanistic model for the transition from the plant to the human telomeric sequences.

38

39 *Zostera marina*, or common eelgrass, belongs to the family Zosteraceae, one of the four  
40 Alismatales families (basal monocots) that make up the seagrasses. *Zostera marina* plays a  
41 crucial role in coastal ecosystems around the world, providing food and shelter to numerous  
42 species. Although it is considered of least concern in terms of conservation status, the  
43 population trend is decreasing worldwide (IUCN red list), threatened by processes such as  
44 fishing, pollution, and the presence of invasive species<sup>1,2</sup>. Recently, the genome of this species  
45 was reported<sup>3</sup>, a resource that has already aided in functional ecological studies in seagrass  
46 ecosystems under global warming<sup>4,5</sup> or evolutionary research<sup>6,7</sup>.

47

#### 48 **Plants with unusual telomeres**

49 A fundamental trait of a species genome is the composition of its telomeres. Telomeres are  
50 terminal chromosomal domains, whose minisatellite sequence is well conserved across large  
51 groups of organisms. Basically, we can refer to the plant-type telomere repeat as (TTAGGG)<sub>n</sub>,  
52 shared by most plants, and to the human-type telomere repeat as (TTAGGG)<sub>n</sub>, shared by  
53 vertebrates and some other animals, while more diverse repeats can be found in fungi, insects,  
54 and others. Such typical telomeric sequences are mostly taken for granted in any species from  
55 a given group, yet recent experience prevents us from making such generalizations. For the  
56 discovery of unusual telomeric sequences in *Cestrum* and *Allium* (well-known genera for their  
57 ornamental and crop plants, respectively), which had remained enigmatic for decades, the  
58 availability of NGS data and bioinformatics tools have been crucial, together with molecular  
59 cytogenetics<sup>8</sup>. The finding of unusual telomeric sequences have had a great scientific impact,  
60 for instance, the exceptionally long *Allium* sequence motif<sup>9</sup> was further utilized as bait for the  
61 identification of *bona fide* telomerase RNAs (TRs) in plants<sup>10</sup>.

62

#### 63 ***Zostera marina* has human-type telomeres**

64 Here we provide compelling evidence that the common eelgrass also harbours unusual  
65 telomeres, composed exclusively of the human-type telomere DNA sequence (Figure 1). We  
66 have done so by (1) analysis of repeats from NGS data, (2) molecular cytogenetics with  
67 telomeric probes using fluorescence *in situ* hybridization (FISH) and (3) identification of its  
68 telomerase RNA, including its template region for synthesis of the telomeric motifs. More  
69 details on the materials and methods used can be found in the Reporting Summary.

70 The first indication that *Z. marina* could have an uncommon telomeric sequence came from  
71 the analysis of genomic data from the Finnish population, reported by Olsen et al. (2016), since  
72 information about telomere composition was not present in their genomic assembly. The  
73 subsequent screening we performed on this dataset revealed the absence of the expected  
74 plant-type and the presence of human-type telomere repeats. Although the quality of raw  
75 sequence data was excellent, and extreme care was taken to avoid any possible contamination  
76 from small marine animals (J. L. Olsen, personal communication), we provide independent  
77 evidence of the presence of human-type telomere repeats, as needed to exclude hypothetical  
78 contamination and to confirm this exceptional finding.

79 Thus, in parallel, we sequenced our own materials from Mediterranean populations of *Z.*  
80 *marina* and ran the same genomic screening. We also included the sequencing of a related  
81 species, *Z. noltii*, which shares the same habitat. While *Z. marina* genomic telomeric screening  
82 yielded exclusively human-type telomere repeats (neglecting reads representing less than  
83 0.001% of the genome portion), *Z. noltii* showed plant-type telomere repeats, also almost  
84 exclusively. Based on the total number of reads analysed and the reads containing telomeric  
85 sequences, the genome portion of human-type telomeric DNA in *Z. marina* was 0.03-0.3%,  
86 while the genome portion of plant-type telomere DNA in *Z. noltii* was 0.06%. The genome  
87 proportion of *Z. marina* telomere DNA represented c. 3kb of telomere sequence per  
88 chromosome arm. This is in accordance with the average telomere length and genome size of  
89 *Arabidopsis thaliana*, which is within the known and small genome size range of *Zostera*.  
90 However, these are only semi-quantitative estimations, because of the NGS library type, which  
91 involves an amplification step biasing the quantitative determination. For more details, see  
92 Extended Data (File 1) in the online content. This study was complemented by the search for  
93 telomeric motifs in the NGS datasets available for Alismatales species in public databases. We  
94 have included species such as the well-known Neptune grass *Posidonia oceanica* (family  
95 Posidoneaceae) and other *Zostera* species. The outcome from the tandem repeat analysis,  
96 showing the most abundant tandem repeats in all these species, can also be found in the  
97 Extended Data (Table 1) in the online content. In all cases, except *Z. marina*, the search yielded  
98 the plant-type motif as the most likely telomeric sequence (0.01-7.31% of the genome  
99 portion); in comparison, the human-type sequence always represented a much lower  
100 proportion of the genome.

101 Although the analysis of NGS datasets clearly indicated that the *Z. marina* genome  
102 unexpectedly harboured these human-type telomeric repeats, cytogenetic confirmation to  
103 prove that these ones actually localize to chromosomal ends was needed. To our surprise, no



104 molecular cytogenetic studies of *Zostera* have been reported. Thus, we prepared  
105 chromosomes from root tips and analysed them by FISH. The plant-type and human-type  
106 probes were independently hybridized to metaphase plates of *Z. marina* and *Z. noltii* (both  $2n$   
107 = 12). Hybridization of *Z. marina* chromosomes with the plant-type probe did not reveal any  
108 signal, while, using the human-type probe, weak but clear signals were observed at most  
109 chromosome ends. In *Z. noltii*, the opposite FISH profile was obtained: positive hybridization  
110 with the plant-type probe, while negative with the human-type probe (Figure 1). As a control  
111 for human-type telomere hybridization in plants, we used chromosomes of *Scilla peruviana*  
112 (Asparagales), known to possess human-type telomeres<sup>11</sup> and whose chromosomes did label  
113 with the human-type probe in the same experiment (data not shown). To further characterize  
114 the chromosome structure in both *Zostera* species, rDNA-FISH was performed. In both species,  
115 a single locus of terminal 35S and interstitial 5S rDNA was identified. However, the two species  
116 differed in the position of the rDNA loci on the chromosomes: for *Z. marina*, 35S and 5S rDNA  
117 were located on one arm of one chromosome while for *Z. noltii*, they were located on different  
118 chromosomes (Figure 2).

119

#### 120 **The telomere template in *Z. marina* telomerase RNA helps us understand telomere sequence** 121 **shifts in closely related species**

122 Finally, we utilized our recent finding of plant telomerase RNA in plants<sup>10</sup> to obtain  
123 independent evidence of the newly found telomeric sequences in *Z. marina*, by analysing its  
124 genomic and transcriptomic data. Telomerase RNA is an essential part of the telomerase  
125 ribonucleoprotein complex, carrying the template region to produce telomeric DNA by reverse  
126 transcription. The template region of the telomerase RNA is usually comprised of two parts.  
127 One of them is a complete telomere motif - “*template sequence*” for reverse transcription (Fig.  
128 1C and 1F), and the second is usually only a partial one, which serves as an annealing sequence  
129 for the existing telomere DNA. We show here, for the first time, that the telomerase RNA  
130 sequences of *Z. marina* and *Z. noltii* serve as human-type and plant-type templates,  
131 respectively. The predicted human-type template region of *Z. marina* originated, most likely,  
132 from the plant-type template by mutation at its borders. The template region of *Z. marina*  
133 could, hypothetically, anneal and synthesize the plant telomere sequence, but the prediction  
134 of human sequence annealing and synthesis fits better with the identified telomerase RNA  
135 from *Z. marina* and, certainly, with the telomeric repeats detected in this species (see Figures 1  
136 and 3). All other *Zostera* species and Alismatales analysed (from available online datasets)  
137 represent exactly the opposite situation, with the plant-type motif in their predicted

138 templates. The reconstruction of the evolution of *Z. marina*'s template region may give us a  
139 clue as to the transition from synthesis of the plant-type to the human-type telomere, driven  
140 by a more stable mode of annealing of telomere DNA to the changed border of its template  
141 region. Complete putative telomerase RNA sequences, in which the corresponding template  
142 region is underlined, and other additional results, are presented in Figure 3 and in the  
143 Extended Data (Figure 1 and Table 2) in the online content.

144 Over the last decade, unusual telomeric sequences have been reported for disparate plant  
145 groups and in particular, the human-type sequence pops up repeatedly across the green plant  
146 phylogeny (Figure 4). Although homoplasy in the evolution of telomere motifs is common, as  
147 short/simple motifs like the plant- or the human-type have appeared repeatedly in distant  
148 groups<sup>11-14</sup>, it has been hypothesized that the ancestral telomere sequence is the human-type  
149 since it is the most commonly found across the tree of life and it is present in the branches  
150 close to the possible root of eukaryote phylogeny<sup>15</sup>. In the plant monocot order Asparagales,  
151 the human variant occurs along with lower abundances of two or more variants of the  
152 minisatellite sequences, including the consensus plant-type telomeric sequence, *Bombyx*-type  
153 (TTAGG) and *Tetrahymena*-type (TTGGGG)<sup>11</sup>, as well as the recently described *Allium*-type  
154 telomere sequence (CTCGGTTATGGG)<sup>9</sup>. Genus *Genlisea* (eudicots) displays a similar profile: the  
155 plant-type is found in some species while others reveal intermingled sequence variants  
156 (TTCAGG and TTTCAGG)<sup>16</sup>. In certain groups of algae (Glaucophyta and Chlorophyta), human-  
157 type telomeric sequences have already been detected in some species or genera, while others  
158 also present the plant-type and other variants<sup>17</sup>. A similar situation applies to the genus  
159 *Zostera* in which both human and plant-type telomeric sequences are found, adding another  
160 exception to the increasingly questioned conservation of telomeric sequences throughout  
161 plants (and perhaps throughout the tree of life).

162 What are the evolutionary implications of this finding? The cases of telomere shifts in closely  
163 related species have huge evolutionary significance, as these not only affect the terminal  
164 chromosomal DNA sequence but, if successfully maintained, must be associated with profound  
165 changes in the protein components of telomeres, which recognize this telomere DNA in a  
166 sequence-specific way. Our data show that the telomere system is more dynamic than  
167 previously thought and that evolution tends to converge to a few successful types, since such  
168 changes are "evolutionarily demanding". This may explain the several independent findings of  
169 the human-type motif (one of the least complex telomeres) in some plants.

170 Moreover, a combination of the available genomic data from Alismatales with the recent  
171 breakthrough of the discovery of plant telomerase RNA<sup>10,18,19</sup> have led us to the astonishing

172 conclusion that the template region in plant telomerase RNA is a very dynamic element, with  
173 unexpectedly variable borders, even in species with the same telomere sequence. The finding  
174 of two distinct telomerase RNA paralogs within several of the Alismatales genomes analysed,  
175 including the *Z. marina* genome assembly, offers an answer to how plants are able to change  
176 their telomeres. In the genome assembly of *Z. marina* we found two telomerase RNA gene  
177 candidates, however, only one with the human-like template region was detected in the  
178 transcriptomic analysis (Extended Data Table 2). Hence, some plants can use mutations in the  
179 template regions (particularly at its borders) of the telomerase RNA paralogs to escape from  
180 telomere sequence uniformity. Thus, our detailed analysis of the *Zostera marina* genome has  
181 revealed the first model for the transition from the plant to the human telomere sequence.

182

183 **Online content** Methods along with any additional Extended Data items are available in the  
184 online version of the paper; references unique to these sections appear only in the online  
185 paper.

186

187 **Reporting summary** Further information on research design is available in the Nature Research  
188 Reporting Summary linked to this paper.

189

190 **Data availability** Raw NGS data files have been deposited in the Sequence Read Archive (SRA)  
191 of the National Center for Biotechnology Information (NCBI). The genomic skimming whole-  
192 genome shotgun sequences for *Zostera marina* and *Z. noltii* are accessible in bioproject  
193 PRJNA594842. The raw transcriptomic data for *Z. marina* are accessible in SRR10664371.

194

195

196 **References**

- 197 1 Borum, J., Monitoring & Seagrasses, M. o. E. *European Seagrasses: An Introduction to*  
198 *Monitoring and Management*. (M&MS Project, 2004).
- 199 2 Infantes, E., Crouzy, C. & Moksnes, P. O. Seed Predation by the Shore Crab *Carcinus*  
200 *maenas*: A Positive Feedback Preventing Eelgrass Recovery? *Plos One* **11**,  
201 doi:10.1371/Journal.Pone.0168128 (2016).
- 202 3 Olsen, J. L. *et al.* The genome of the seagrass *Zostera marina* reveals angiosperm  
203 adaptation to the sea. *Nature* **530**, 331-335, doi:10.1038/nature16548 (2016).
- 204 4 Lamb, J. B. *et al.* Seagrass ecosystems reduce exposure to bacterial pathogens of  
205 humans, fishes, and invertebrates. *Science* **355**, 731-733, doi:10.1126/science.aal1956  
206 (2017).
- 207 5 Yin, R. H. & Ulm, R. How plants cope with UV-B: from perception to response. *Curr*  
208 *Opin Plant Biol* **37**, 42-48, doi:10.1016/j.pbi.2017.03.013 (2017).
- 209 6 Brawley, S. H. *et al.* Insights into the red algae and eukaryotic evolution from the  
210 genome of *Porphyra umbilicalis* (Bangiophyceae, Rhodophyta). *P Natl Acad Sci USA*  
211 **114**, E6361-E6370, doi:10.1073/pnas.1703088114 (2017).
- 212 7 Chater, C. C. *et al.* Origin and function of stomata in the moss *Physcomitrella patens*.  
213 *Nat Plants* **2**, doi:10.1038/Nplants.2016.179 (2016).
- 214 8 Peska, V. *et al.* Characterisation of an unusual telomere motif (TTTTTAGGG)(n) in the  
215 plant *Cestrum elegans* (Solanaceae), a species with a large genome. *Plant J* **82**, 644-  
216 654, doi:10.1111/tpj.12839 (2015).
- 217 9 Fajkus, P. *et al.* *Allium* telomeres unmasked: the unusual telomeric sequence  
218 (CTCGTTATGGG)(n) is synthesized by telomerase. *Plant J* **85**, 337-347,  
219 doi:10.1111/tpj.13115 (2016).
- 220 10 Fajkus, P. *et al.* Telomerase RNAs in land plants. *Nucleic Acids Res* **47**, 9842-9856,  
221 doi:10.1093/nar/gkz695 (2019).
- 222 11 Sykorova, E. *et al.* Telomere variability in the monocotyledonous plant order  
223 Asparagales. *P Roy Soc B-Biol Sci* **270**, 1893-1904, doi:10.1098/rspb.2003.2446 (2003).
- 224 12 Peska, V. & Garcia, S. Origin, Diversity and Evolution of Telomere Sequences in Plants.  
225 *Front Plant Sci*, doi:10.3389/fpls.2020.00117 (2020).
- 226 13 Puizina, J. *et al.* Karyotype analysis in *Hyacinthella dalmatica* (Hyacinthaceae) reveals  
227 vertebrate-type telomere repeats at the chromosome ends. *Genome* **46**, 1070-1076,  
228 doi:10.1139/g03-078 (2003).
- 229 14 Weiss, H. & Scherthan, H. *Aloe* spp.--plants with vertebrate-like telomeric sequences.  
230 *Chromosome res* **10**, 155-164, doi:10.1023/a:1014905319557 (2002).
- 231 15 Fulneckova, J. *et al.* A broad phylogenetic survey unveils the diversity and evolution of  
232 telomeres in eukaryotes. *Genome Biol Evol* **5**, 468-483, doi:10.1093/gbe/evt019  
233 (2013).
- 234 16 Tran, T. D. *et al.* Centromere and telomere sequence alterations reflect the rapid  
235 genome evolution within the carnivorous plant genus *Genlisea*. *Plant J* **84**, 1087-1099,  
236 doi:10.1111/tpj.13058 (2015).
- 237 17 Fulneckova, J. *et al.* Dynamic Evolution of Telomeric Sequences in the Green Algal  
238 Order Chlamydomonadales. *Genome Biol Evol* **4**, 248-264, doi:10.1093/gbe/evs007  
239 (2012).
- 240 18 Dew-Budd, K., Cheung, J., Palos, K., Forsythe, E. S. & Beilstein, M. A. Evolutionary and  
241 biochemical analyses reveal conservation of the Brassicaceae telomerase  
242 ribonucleoprotein complex. *bioRxiv*, 760785, doi:10.1101/760785 (2019).
- 243 19 Song, J. R. *et al.* The conserved structure of plant telomerase RNA provides the missing  
244 link for an evolutionary pathway from ciliates to humans. *P Natl Acad Sci USA* **116**,  
245 24542-24550, doi:10.1073/pnas.1915312116 (2019).
- 246

247 **Acknowledgements** We are thankful to Jeanine Olsen who kindly discussed several aspects on  
248 this paper; Javier Romero and Francesca Rossi for their careful indications on where to find the  
249 studied *Zostera* and to Jordi Rull, Amelia Gómez and Joan Pere-Pascual Díaz who assisted in  
250 plant collection and DNA extraction. This work was supported by: ERDF [project SYMBIT, reg.  
251 no. CZ.02.1.01/0.0/0.0/15\_003/0000477], Czech Science Foundation [17-09644S and 19-  
252 03442S], Ministry of Education, Youth and Sports of the Czech Republic [project CEITEC 2020  
253 (LQ1601)], and by the Spanish [CGL2016-75694-P (AEI/FEDER, UE)] and Catalan [grant number  
254 2017SGR11116] governments. VP benefited from an EMBO Short-Term fellowship (grant no.  
255 7368) and SG is the holder of a Ramón y Cajal contract (RYC-2014-16608). We also  
256 acknowledge the CF Genomics CEITEC MU supported by the NCMG research infrastructure  
257 (LM2015091 funded by MEYS CR). Access to computing and storage facilities owned by parties  
258 and projects contributing to the National Grid Infrastructure MetaCentrum  
259 (<https://metavo.metacentrum.cz/en/index.html>) provided under the programme "Projects of  
260 Large Research, Development, and Innovations Infrastructures" (CESNET LM2015042), is  
261 greatly appreciated.

262

263 **Author Contributions** VP and SG initiated the project. VP, MM and SG performed the  
264 bioinformatic search of telomere motifs in SRA datasets. VP, SG and DV obtained and  
265 processed *Z. marina* and *Z. noltii* material for DNA extraction and chromosome preparation.  
266 TM performed the molecular cytogenetics experiments. PF and JF searched the TR subunit in  
267 the NGS datasets. SG and VP wrote the manuscript and all authors participated in the  
268 manuscript revision.

269

270 **Competing interests** The authors declare no competing interests.

271

272

273

274 **METHODS**

275 **Plant material collection, DNA and RNA extraction.** Young plants of *Zostera marina* and *Z.*  
276 *noltii* were collected in the wild (Location: Étang de Thau, beach next to the Musée de l'Étang  
277 de Thau, Sète, France. Collectors: Sònia Garcia, Amelia Gómez, Vratislav Peska, Jordi Rull &  
278 Daniel Vitales. Date: 20.02.2018). Vouchers are deposited at the Herbarium of the Institut  
279 Botànic de Barcelona with the numbers BC973540 (*Z. noltii*) and BC973541 (*Z. marina*). The  
280 leaves were carefully cleaned and inspected for the absence of other organisms. After that,  
281 they were wiped by paper tissue and frozen on dry ice. They were stored at -80 °C until usage.  
282 Genomic DNA was extracted by a CTAB method<sup>20</sup> and the quality checked with Qubit  
283 Fluorometric Quantification (ThermoFisher Scientific, 128 Waltham, Massachusetts, USA).  
284 Actively growing young roots were harvested from collected plants, and subsequently split into  
285 two aliquotes. The first aliquote was pre-treated with 0.05% aqueous colchicine for 2h 30 min  
286 at room temperature, fixed in ethanol/acetic acid (3:1, v/v) fixative for 24 h at 4 °C and stored  
287 at -20 °C until further use. The second aliquote was frozen on dry ice and stored at -80 °C until  
288 usage in the RNA extraction by TRI Reagent® (Sigma-Aldrich) according to the manufacturer's  
289 instructions. The extracted RNA was checked on an Agilent 2200 TapeStation system (Agilent  
290 Technologies) using RNA ScreenTape® (Agilent Technologies) and RNA concentration was  
291 determined by a Qubit 2.0 fluorometer using a Qubit™ RNA BR Assay Kit. Ribosomal RNAs  
292 were depleted from 5 µg of total RNA of the sample by Ribo-Zero rRNA Removal Kit (Seed,  
293 Root) (Illumina®). After rRNA depletion, samples were diluted in 10 µl of RNase-free water and  
294 5 µl of the sample were used for RNA library construction using NEBNext® Ultra™ II Directional  
295 RNA Library Prep Kit for Illumina® (NEB) according to the manufacturer's instructions. Library  
296 was treated by a fragment size selection in range from c. 200 to 500 bp using  
297 AGENCOURT® AMPURE® XP magnetic beads (Beckman Coulter). Library quality was checked by  
298 an Agilent 2200 TapeStation system using High Sensitivity D1000 ScreenTape® (Agilent  
299 Technologies).

300 **Illumina sequencing.** Extracted genomic DNA was sent to the NGS provider (BGI Genomics,  
301 Shenzhen, China) and skimmed genomic sequencing on Hiseq4000 was ordered for each  
302 sample. Approximately 15 million of 2 × 150 bp PE reads were obtained from each species. The  
303 cDNA Library (total RNA, rRNA depleted, and converted to cDNA) was sequenced in CEITEC MU  
304 Genomics Core Facility on a NextSeq500 platform (Illumina®) using NextSeq 500 v2.5., mid  
305 Output 150 cycles kits (Illumina®) for 2 × 75 bp PE reads. Raw reads are deposited in GenBank  
306 under the accession numbers SRR10664371 (RNAseq from *Z. marina*), SRR10664317 (genomic  
307 NGS data for *Z. marina*) and SRR10664318 (genomic NGS data for *Z. noltii*).

308 **NGS data analysis.** The telomere sequences from Alismatales were searched in the genomic  
309 skimming data obtained from BGI and GenBank by Tandem Repeats Finder (TRFi) tool  
310 (<https://tandem.bu.edu/trf/trf.html>): *Alocasia odora* (Araceae) - SRR7121940, *Halophila ovalis*  
311 (Hydrocharitaceae) - SRR5877255, *Lemna gibba* (Araceae) - SRR074103, *Lemna minor*  
312 (Araceae) - SRR2882980, *Posidonia oceanica* (Posidoniaceae) - SRR2315671, *Spirodela*  
313 *polyrhiza* (Araceae) - SRR7548932, *Wolffia australiana* (Araceae) - SRX3579183, *Valisneria*  
314 *spinulosa* (Hydrocharitaceae) - SRR6038670, *Zostera muelleri* (Zosteraceae) - SRR1714574,  
315 *Zostera marina* (Zosteraceae) - SRR3926352. *Zostera marina* (Zosteraceae) - SRR10664317, our  
316 dataset, *Zostera noltii* (Zosteraceae) - SRR10664318, our dataset. Subsequent analysis with  
317 custom made scripts were performed according to Peska et al. (2017)<sup>21</sup>. Briefly, the TRFi script  
318 was set to look for the short tandems with the unit size of 4-50 nt in at least pentamerous  
319 array. Motifs were sorted in descending order in each species. Human and plant telomere  
320 motifs were manually found in the final output. A summarized output of the most abundant  
321 tandem repeats, including telomere motifs, is presented in the Extended Data (Table 1). RNA-  
322 seq *de novo* assembly of data published in GenBank (SRR10664371) was done using Trinity-  
323 v2.7.0 (<https://github.com/trinityrnaseq/trinityrnaseq/wiki>). The assembly was performed as  
324 stranded RNA-seq with paired-end fastq datasets. Putative TR from *Z. marina* were found out  
325 using blast with published orthologs<sup>10,18,19</sup>.

326 **Telomerase RNA search analysis.** Telomerase RNA (TR) orthologs were identified in publicly  
327 available datasets, going from TRs published from Alismatales using novel TR candidates in  
328 BLAST searches. The final set of TR presented in this work was aligned in Geneious 8.1.9  
329 (<https://www.geneious.com>) using MAFFT alignment (Algorithm: E-INS-I; Scoring matrix:  
330 200PAM/k = 2; gap open penalty: 1.53).

331 **Chromosome preparation.** Chromosome spreads from root tips were prepared according to a  
332 published protocol<sup>22</sup>. Briefly, selected root tips were rinsed in distilled water (twice for 5 min)  
333 and sodium citrate buffer (10 mM sodium citrate, pH 4.8; twice for 5 min), and digested in  
334 0.3% (w/v) cellulase, cytohelicase and pectolyase (all Sigma-Aldrich, St Louis, MO, USA) in  
335 citrate buffer at 37 °C for 90 min. After digestion, individual root tips were dissected on a  
336 microscope slide in approximately 10 µl acetic acid and covered with a cover slip. The cell  
337 material was then spread evenly by tapping, thumb pressing and gentle flame-heating. Finally,  
338 the slide was quickly frozen in liquid nitrogen and the cover slip flicked off with a razor blade.  
339 The slide was fixed in ethanol-acetic acid (3:1) and air-dried. Ready-to-use chromosome  
340 spreads were checked under a phase contrast microscope for suitable mitotic chromosome  
341 figures and the amount of cytoplasm. When appropriate, preparations were treated with 100

342  $\mu\text{g/ml}$  RNase (AppliChem) in 2 $\times$  sodium saline citrate (SSC; 20 $\times$  SSC: 3 M sodium chloride, 300  
343 mM trisodium citrate, pH 7.0) for 60 min and 0.1 mg/ml pepsin (Sigma) in 0.01 M HCl at 37 °C  
344 for 5 min, then post-fixed in 4% formaldehyde in 2 $\times$  SSC for 10 min, washed in 2 $\times$  SSC twice for  
345 5 min, and dehydrated in an ethanol series (70%, 90%, and 100%, 2 min each).

346 **DNA probes preparation.** The plant-type (TTTAGGG) $_n$  and human-type (TTAGGG) $_n$  telomere  
347 repeat probes were prepared according to protocol for non-template PCR<sup>23</sup>. The *Arabidopsis*  
348 *thaliana* BAC clone T15P10 (AF167571) bearing 35S rRNA gene repeats was used for in situ  
349 localization of nucleolar organizer regions (NORs), and the *A. thaliana* clone pCT4.2 (M65137),  
350 corresponding to a 500 bp 5S rDNA repeat, was used for localization of 5S rDNA loci. All DNA  
351 probes were labeled with biotin- or digoxigenin-dUTP by nick translation as described by  
352 Mandáková and Lysak (2016b)<sup>24</sup>. Labeled probes were ethanol precipitated, desiccated and  
353 dissolved in 20  $\mu\text{l}$  of 50% formamide and 10% dextran-sulfate in 2 $\times$  SSC for 3 h.

354 **In situ hybridization and microscopy.** For FISH, 20  $\mu\text{l}$  of the labeled probe were pipetted on a  
355 chromosome-containing spread and immediately denatured on a hot plate at 80 °C for 2 min.  
356 Hybridization was carried out in a moist chamber at 37°C overnight, followed by post-  
357 hybridization washing in 20% formamide in 2 $\times$  SSC at 42 °C. The immunodetection of hapten-  
358 labeled probes was performed as described by Mandáková and Lysak (2016b)<sup>24</sup>. Chromosomes  
359 were counterstained with DAPI (2  $\mu\text{g/ml}$ ) in Vectashield. Fluorescence signals were analysed  
360 and photographed using a Zeiss Axioimager Z2 epifluorescence microscope and a CoolCube  
361 camera (MetaSystems). Images were acquired separately for all three fluorochromes using  
362 appropriate excitation and emission filters (AHF Analysentechnik). The monochromatic images  
363 were pseudocolored and merged using Photoshop CS software (Adobe Systems).

364

365



366     **REFERENCES**

367

368     20     Doyle, J. J. & Dickson, E. E. Preservation of Plant-Samples for DNA Restriction  
369     Endonuclease Analysis. *Taxon* **36**, 715-722, doi:Doi 10.2307/1221122 (1987).

370     21     Peska, V., Sitova, Z., Fajkus, P. & Fajkus, J. BAL31-NGS approach for identification of  
371     telomeres de novo in large genomes. *Methods* **114**, 16-27,  
372     doi:10.1016/j.ymeth.2016.08.017 (2017).

373     22     Mandakova, T. & Lysak, M. A. Chromosome Preparation for Cytogenetic Analyses in  
374     Arabidopsis. *Curr Protoc Plant Biol* **1**, 43-51, doi:10.1002/cppb.20009 (2016).

375     23     Ijdo, J. W., Wells, R. A., Baldini, A. & Reeders, S. T. Improved telomere detection using  
376     a telomere repeat probe (TTAGGG)<sub>n</sub> generated by PCR. *Nucleic Acids Res* **19**, 4780,  
377     doi:10.1093/nar/19.17.4780 (1991).

378     24     Mandakova, T. & Lysak, M. A. Painting of Arabidopsis Chromosomes with  
379     Chromosome-Specific BAC Clones. *Curr Protoc Plant Biol* **1**, 359-371,  
380     doi:10.1002/cppb.20022 (2016).

381     25     Byng, J. W. *et al.* An update of the Angiosperm Phylogeny Group classification for the  
382     orders and families of flowering plants: APG IV. *Bot J Linn Soc* **181**, 1-20,  
383     doi:10.1111/boj.12385 (2016).

384     26     Leebens-Mack, J. H. *et al.* One thousand plant transcriptomes and the phylogenomics  
385     of green plants. *Nature* **574**, 679-+, doi:10.1038/s41586-019-1693-2 (2019).

386     27     Kumar, S., Stecher, G., Suleski, M. & Hedges, S. B. TimeTree: A Resource for Timelines,  
387     Timetrees, and Divergence Times. *Mol Biol Evol* **34**, 1812-1819,  
388     doi:10.1093/molbev/msx116 (2017).

389

390

391

392 **Figure 1.** Morphological appearances in *Zostera noltii* and *Z. marina*, respectively - images from  
393 Wikipedia - public domain (A, D), schematic model of telomerase RNAs (TR) and telomerase  
394 reverse transcriptase (TERT) indicating the annealing and template regions in the synthesis of  
395 telomeric DNA (B, E); fluorescence *in situ* hybridization of telomere probes on mitotic  
396 chromosomes and (C, F; scale bars = 10  $\mu$ m).

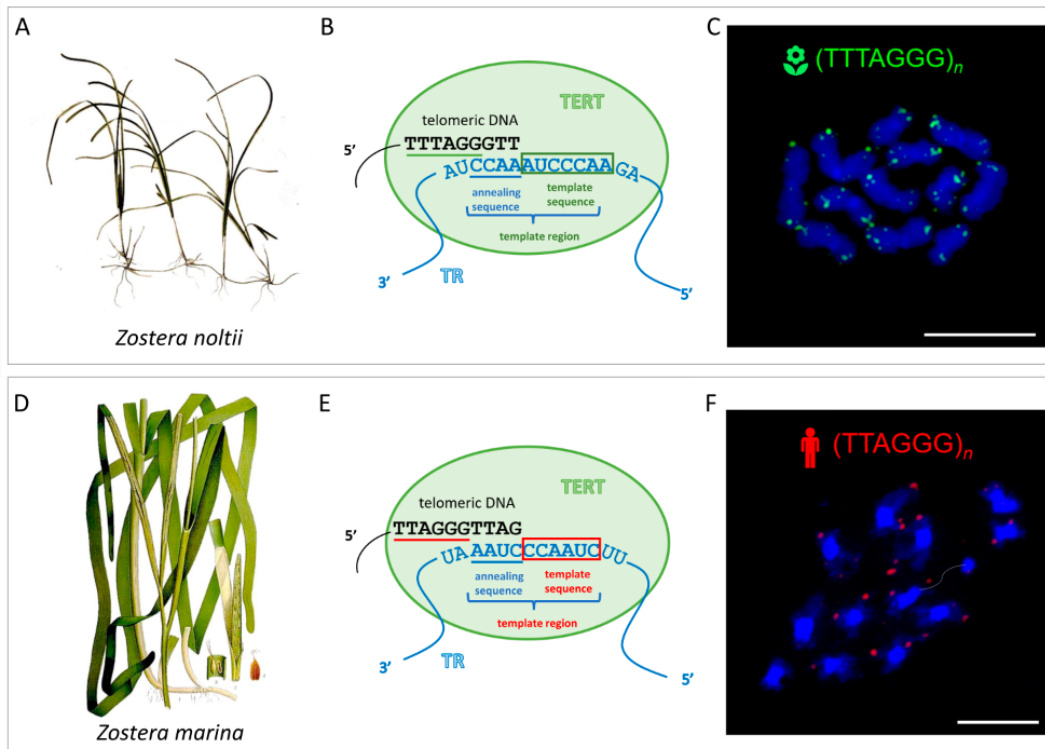

397

398

399

400

401

402

403 **Figure 2.** Karyotypes of *Zostera noltii* and *Z. marina*. Both species bear a single terminally  
404 located 35S rDNA locus and a single interstitial 5S rDNA locus. While 35S and 5S are situated  
405 on different chromosomes in *Z. noltii*, they occupy the same chromosome in *Z. marina*. Note,  
406 highly decondensed 35S rDNA site in *Z. marina* (dotted line). The plate of *Z. marina* is  
407 incomplete, showing only eleven chromosomes. Scale bars = 10  $\mu$ m.

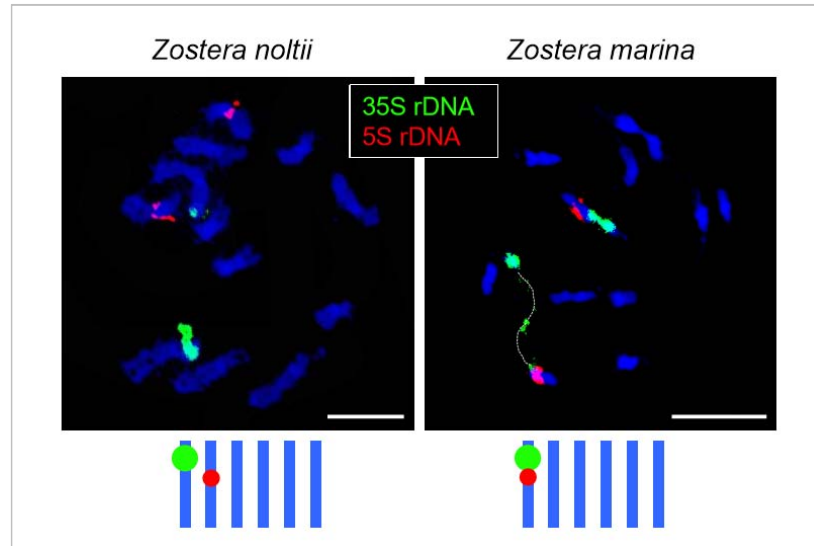

408

409

410 **Figure 3.** Alignment of telomerase RNAs of several Alismatales species showing the putative  
 411 template regions (underlined) in which the borders are variable even for plants with the same  
 412 telomere sequence (e.g. *L. minor*, *P. oceanica*, and *Z. capensis*) or for paralogs from the same  
 413 species (e.g., TR1 and TR2 from *Z. muelleri*) (A). The template region may expand, shrink or  
 414 shift according to the sequence mutation at its borders and adjacent surroundings, as  
 415 suggested in our model for human- and plant-type telomeric sequence synthesis in *Z. noltii* and  
 416 *Z. marina*. A more stable mode of annealing of telomere DNA to the changed border of the  
 417 template region drives the transition from plant- to human-type sequence synthesis in *Z.*  
 418 *marina*. (B). The annealing part of template region is highlighted in bold font, the newly  
 419 synthesized DNA is in red.

420

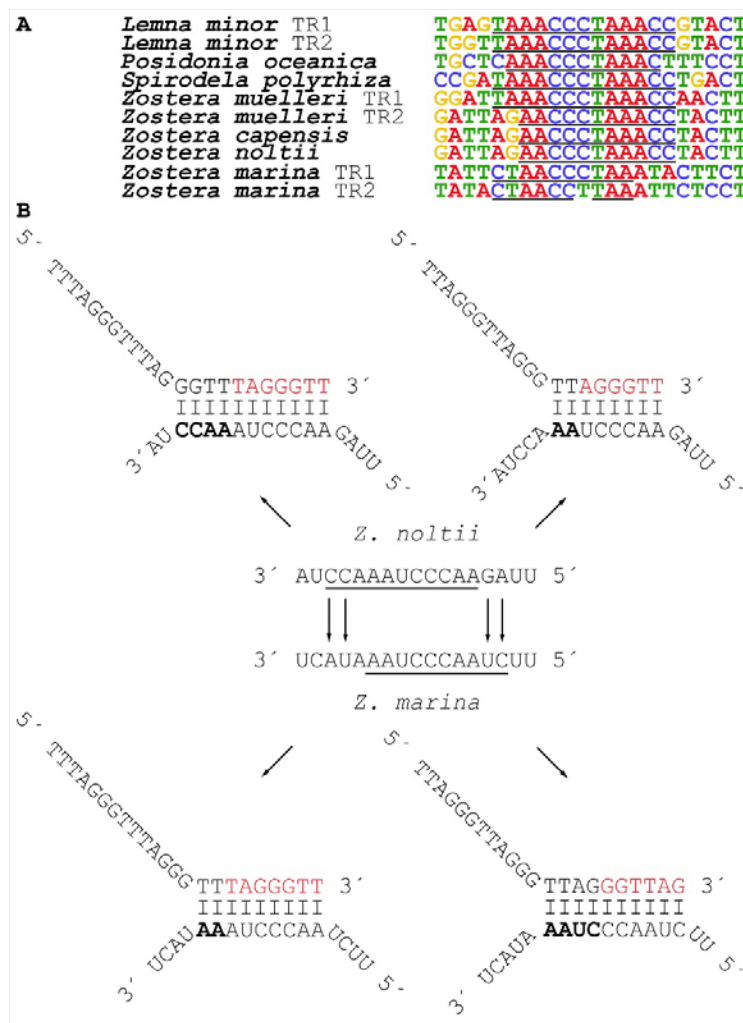

421

422

423

424 **Figure 4.** Occurrences of the plant-type and human-type telomere motifs in Archaeplastida  
425 (plants in the broad sense), based the APG IV (The Angiosperm Phylogeny Group 2016)<sup>25</sup> and  
426 on the One Thousand Plant Transcriptomes Initiative (2019)<sup>26</sup> Branch lengths do not express  
427 real time scales. For simplicity reasons, some groups have been collapsed or represented by a  
428 single branch. Some minor orders (Acorales, Petrosaviales, Trochodendrales, Buxales,  
429 Gunnerales, Dilleniales, Zygophyllales, Crossosomatales, Picramniales, Huerteales, Icaciniales,  
430 Metteniusales, Garryales, Escalloniales, Bruniales and Paracryphiales) not depicted on the  
431 tree. The green flower represents the plant-type telomere sequence (TTTAGGG) and the red  
432 man the human-type telomere sequence (TTAGGG). The light red man represents cases in  
433 which there is some evidence (FISH, slot blot of from NGS data only) that would point to the  
434 presence of the human-type sequence, but further work is needed to confirm it.

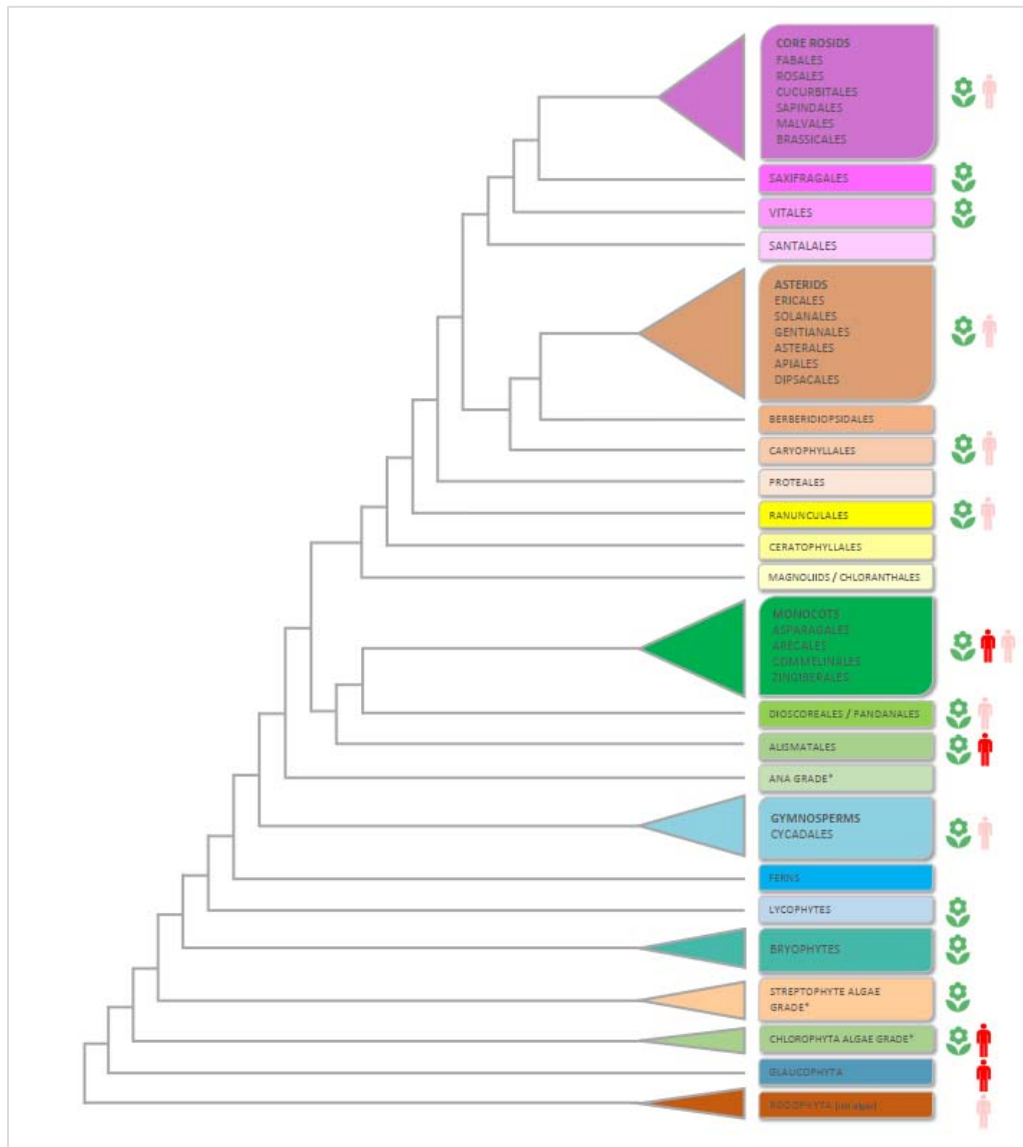

435

436 **Extended Data Figure 1.** Tree showing phylogenetic relationships between selected  
437 Alismatales based on TimeTree.org<sup>27</sup>. *Zostera marina*, which is the only one with human-like  
438 telomeres, stands outside of the group formed by the other *Zostera* species analysed in this  
439 work.

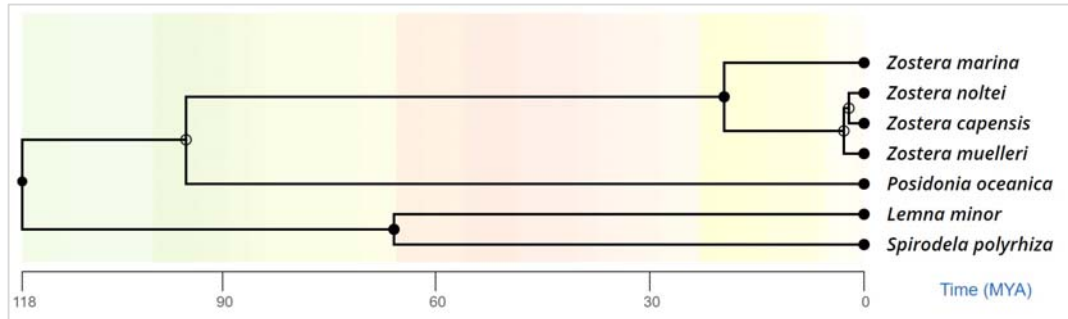

440

441

442

443 **Extended Data Table 1.** Report on the most abundant tandem repeats from TRFi analysis in  
444 several Alismatales species. Plant-type telomere sequences indicated in green and human-type  
445 telomere sequences indicated in blue.  
446 (see independent file Extended Data Table 1.pdf)

447 **Extended Data Table 2.** Predicted telomerase RNA sequences of Alismatales species. The  
448 sequences of the predicted telomerase RNAs were obtained from or ABG – Applied  
449 Bioinformatics Group  
450 ([http://appliedbioinformatics.com.au/index.php/Seagrass\\_Zmu\\_Genome](http://appliedbioinformatics.com.au/index.php/Seagrass_Zmu_Genome)), NCBI - National  
451 Center for Biotechnology Information (<https://www.ncbi.nlm.nih.gov/>), and CoGe –  
452 Comparative Genomics (<https://genomeevolution.org/coge/>).

453 TR1 and TR2 indicate two possible paralogs for telomerase RNA. TR1a and TR2 from *Z. marina*  
454 are genomic sequences. TR1a includes complete promoter and terminator non-transcribed  
455 sequences, while TR2 from *Z. marina* lacks several promoter elements. The TR1b from *Z.*  
456 *marina* was assembled for this study from reads obtained in RNA-Seq from root tips.  
457 Underlined nucleotides represent the predicted template regions. Note, the red dinucleotide  
458 of CT in *Z. marina* TR1b, which as an evolutionary novelty changes the template annealing  
459 potential to the preferred human-like telomere sequence. On the other hand, the potential for  
460 the plant telomere motif synthesis has not been completely lost in *Z. marina* template motif  
461 (green highlighting). In the non-transcribed TR2 of *Z. marina*, there is an additional mutation (C  
462 --> T) in the template region, which would potentially lead to (TTAGG)<sub>n</sub> (known from insects,  
463 blue highlighting) telomere sequence. From this point of view, the *Z. marina* TR represents  
464 transitional state producing human-type sequence, with a trace of plant-type synthesis.

***Lemna minor* (TR1) (Lemnaceae)**

Sequence ID: lminor\_contig\_4989, Coordinates: 12166-12483, Source: CoGe, Genome ID:27408

AATCCACATCGGAAAATCAGAGAAATCAAGATTTAATATATTTGCAAGTCTGCTAAAAATAGTAATTATCCAGGGGAAGGGT  
AGAGAGGTTAGAGAGAGAACTGCTACTGAGTAAACCCCTAAACCGTACTCTTAATTGAGGAATCTACCGGGCTTGATAGTGGGC  
TGTTTGTCCGGCGTTTGAGCTCCCGGGTTGAAA GGCCCAATGAAATGCCGATGCACGCGGCTTCTCTCTAAACCATTTGGAAG  
AGGCTTGATGGGGGCAAACCTGATTTGCCGATTTCCCTCGTCCCTCCCAAATCCCTGTTTTCTTC

***Lemna minor* (TR2) (Lemnaceae)**

Sequence ID: lminor\_contig\_4989, Coordinates: 10338-10654, Source: CoGe, Genome ID:27408

AATCCACATCGAAAAATCAGAGTAATTGAGATTCATTATATTTGATGCCTGGTTAAAAAACAATAATCCAGGGGAACGATG  
AGAGAGATTAGAGAGAGGAATTGCTACTGGTTAAACCCCTAAACCGTACTCTTATTGAGGATTCAGTTGGGCTTTGTTAACGGGC  
TGTTTATCCGGCGTTTGAGCTCCCGGGTTGAAAGGCCCAATGAAACGCCGATGCACGCGGGTTCTCTCCCTAATCCTTGGGAAG  
AGGCTAGTAGGGGGCAAACCTGTTTGCCGATTTCCCTCGCCCTCCCAAATCCCTGTTTTTCATAA

***Posidonia oceanica* (TR1) (Posidoniaceae)**

Sequence ID: GFJT01022271.1 Coordinates: 1-297 Source: NCBI

TTCCATTTCCGCCAAGCTGCTCACAGTATACGGGCTCGGCATCCACCTTCCGGGGATGAGGTGGCTTGGGAGTACACTTGAC  
CAAAGCATGCTTATGTGTGCTCAAACCCCTAAACTTTCCTTAAAGTGAGGTTTCGAGTTAACCTTACCAAAGAGGTA  
TATTTAACCTCTGTAATAAAAAAATACTGATGCCTTGACTCCCAAAGTAGATATGCTACGGGAAGGCTTGAAGGGGG  
TTGCCTCGGCAACCGATATCCTCGCCTTCCAAGTCCCAT



|                                                                                                                                                                                                                                                                                                                                                                                                     |
|-----------------------------------------------------------------------------------------------------------------------------------------------------------------------------------------------------------------------------------------------------------------------------------------------------------------------------------------------------------------------------------------------------|
| <b><i>Spirodela polyrhiza</i> (TR1) (Araceae)</b>                                                                                                                                                                                                                                                                                                                                                   |
| Sequence ID: UNPA01000014.1 Coordinates: 2999451-2999833 Source: NCBI                                                                                                                                                                                                                                                                                                                               |
| CCAAAAATCCCAATCGGTAATTTTTCAAGAAACATATGCGGTTATATATTCAGCTGACCATGGTTTTAACTCTCCAGGGGCAAG<br>TGGGGATAGGAGGGCAGCCGCTCAGGCACCCGTTGACCGGGTTGCCGATAAAACCTAAACCTGACTCTACTGAGGTGACGCT<br>CCCAGCTTCACTGGGTAGTGAAAGAGGGCGGGGCTGTTTACCCGGCGTTTAAAGCCTCCCTTCTCCACCCGTCTTTGAGAAAT<br>TCAAACGCGGATGCCCGGGCTGCCCTCCATCGATTATATCGTACCA CGGGAGCGCTCGAGGGGGCGGCGCCGACAGGCTA<br>GCCGAGGTCCTCGCCCTCCAAGCCCCTGTTTTCTCTCTCGA |
| <b><i>Zostera capensis</i> (TR1)</b>                                                                                                                                                                                                                                                                                                                                                                |
| Sequence ID: PRJNA503110 - assembled <i>de novo</i> from raw reads Source: NCBI                                                                                                                                                                                                                                                                                                                     |
| GTCCACACAGCCGTTGAGATGAAAAATAGAACATATATAAACTAAAAAGCAAGACATACAACACCTCCTGGGGGAATTTCA<br>CAAGGAGATTATGACAGCAATCCCATCAGCAACATCGTTGGGATTAGAACCTAAACCTACTTCTCTGGAAGGTCTTTAAACGTCCA<br>CTGTACTGAGAAAGGACTGAGGAGGTACTTTTTCCGGTGTAAACCTTCTATAAACAATAAAACATCGATGCCCTGCCTCTGTT<br>CTCCTGTGGGTTGTTGTTGGGTAAGTCTTGAAGGGGTTTATGAAAAAACACCGATGTCCTCGACTCTCCAACCCCAAGT<br>CCCCTTTTTATTCAA                            |
| <b><i>Zostera marina</i> (TR1a)</b>                                                                                                                                                                                                                                                                                                                                                                 |
| Sequence ID: LFYR01000762.1 Coordinates: 70571-71209 Source: NCBI (genome assembly by Olsen et al. 2015)                                                                                                                                                                                                                                                                                            |
| GTCCACACCCGCAAAGAAATAAATTTAAAGCATATATAATAAAAAACCTATTTATAAATAACTTATTGGAGGGTTTGTG<br>TTCCACCAGTAGTTTATTGACGTTTGTCTATTCTAACCTAAATACTTCTTCTAGAAAAGAGTTAATGTATGCTAAAAAGTAG<br>GTATTTCTCCGAGATTTACCTGAAATGAATATGAAAAATCTCGATGCTTCTGCCTCTGACTTCTGTGATTGATTGTTGGGGAA<br>ATCTTTGTAGGGAGTATTGTTGTTTCATAACTGATATCCTCGGCTTCTCAACAATCAAATTCCTCTGTTTTCATTTAATTT                                                   |
| <b><i>Zostera marina</i> (TR1b)</b>                                                                                                                                                                                                                                                                                                                                                                 |
| Sequence ID: SRR10664318 – assembled <i>de novo</i> from raw transcriptomic reads Source: This study                                                                                                                                                                                                                                                                                                |
| GTTTGTGTTTCCACAGTAGTTTATTGACGTTTGTCTATTCTAACCTAAATACTTCTTCTAGAAAAGAGTTAATGTATGCTAA<br>AAAGTAGGATTTTCTCCGAGATTTACCTGAAATGAATATGAAAAATCTCGATGCTTCTGCCTCTGACTTCTGTGATTGATTG<br>TGGGAAATCTTTGTAGGGAGTATTGTTGTTTCATAACTGATATCCTCGGCTTCTCAACAATCAAATTCCTCA                                                                                                                                                |
| <b><i>Zostera marina</i> (TR2)</b>                                                                                                                                                                                                                                                                                                                                                                  |
| Sequence ID: LFYR01001054.1 Coordinates: 856312 - 856652 Source: NCBI (genome assembly by Olsen et al. 2015)                                                                                                                                                                                                                                                                                        |
| CATGATATACATCCTTACCGGAGGGTTGTGATTGATCATAAGTACGTAGTTTATTACAGTTTGTTCACCCAGTCGGTATAGGT<br>GGTATACTAACCTTAAATTTCTCCTTTCTTTAGAAAAGAGTTGATTATGTAATAATCA GATA GTTTCTTTGAGATTTATGTCTGAA<br>ATAAATATGAAAAATCTCGATGCTTCTGCCTCTGTAATCGATCTTGCAATTCTTGGGGAAAGTTAATTTGTAAGGAGTGAT<br>GCTTGTTCATCACTGATATATCCTCGGCTTCTCAACAATCAAATTCCTCTGTTTTGATGTCA GAATATACGATTA                                                |
| <b><i>Zostera noltii</i> (TR1)</b>                                                                                                                                                                                                                                                                                                                                                                  |
| Sequence ID: SRR2409708 – assembled from raw reads Source: NCBI                                                                                                                                                                                                                                                                                                                                     |
| CTTGGGGGAATTTACAAGGAGATTATGACGCAATCCCATCAGCAACATCGTTGGGATTAGAACCTAAACCTACTTCTCTGGAA<br>GGTCTTTAATGTCCANNTGTATGAGAGAGGACTGAGGAGGTACTTTTTCCGGTGTAAACCTTCTATAAACAATAAAACATCGA<br>TGCCCTGCCTCTGTTCTCCTGTGGGTTGTTG                                                                                                                                                                                       |
| <b><i>Zostera muelleri</i> (TR1)</b>                                                                                                                                                                                                                                                                                                                                                                |
| Sequence ID: Zmu_v1_s5374_62084 Coordinates: 11965-12335 Source: ABG                                                                                                                                                                                                                                                                                                                                |
| AGTCCACACAGCCGTTGGGAAGAAAAATAGAACATATATAAAACAAATAAGCAAAATTTACATCACTTTCTGGGGGAATTT<br>CACTAGGAGACCAATGACGCTTTCCCAACAGCAACATCGGTGGGATTAAACCTAAACCAACTTCTCGGAAGGTCTTTGATCAT<br>GTCCATTGACTGGAGAGGACTGAGGAGGTACTTTTACCGGTGTTAACCTTCTATAAACAATAAAACATCGATGCCCTGCCTG<br>TGTTCTCCAGTGGGTTGTTGGTGGGTTAAGTCTTGAAGGGGTTTATGAAAAAACACCATTTGCTCGACTTCTCCAACC                                                    |

CCAAATCCCCTCTTTAATTTAATTTAA

***Zostera muelleri* (TR2)**

Sequence ID: Zmu\_v1\_s7592\_29784\_9366\_29784 Coordinates: 8581-8221 Source: ABG

GTCCACACAGCCGTTGGGATAAAAAATAGAAGCATATATAAACTCAAAGCAAGACTACGACACCTTCTTGGGGGAATTCAC  
AAGGAGATTATTGCAGCAATCCCATCAGCAACATCTTTGGGATTA GAACCTAAACCTACTTCTTGGGAAGGTCTATAATGCCAC  
CGTACTGAGA GAGGACTGAGGAGGTACTTTTTCCGGTGTTAACCTTCTATAAACAA TAAAAACATCGATGCTCCTGCCTCTGTTC  
TCCTGTGGGTTGTTGTTGGGTAAGTCTTGAAGGGGTTGTTATGAAAAACACCGATGTCCTCGACTCTTCCCAACCCAAGTTCC  
CCTCTTTAATTTAATTT

465

A

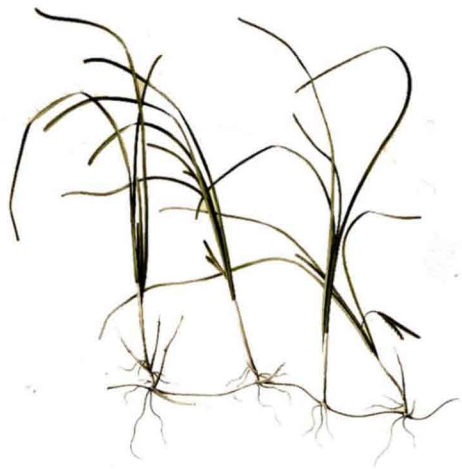

*Zostera noltii*

B

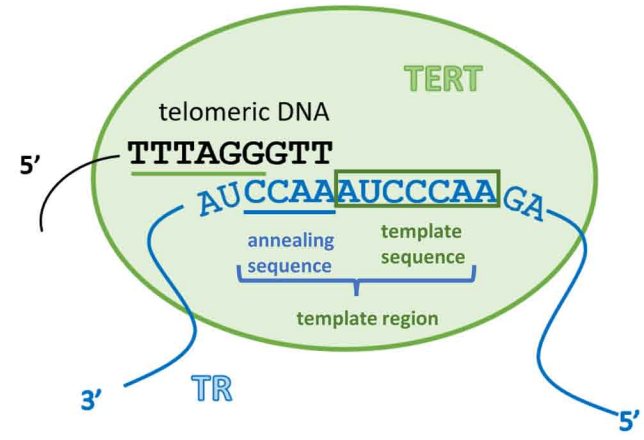

C

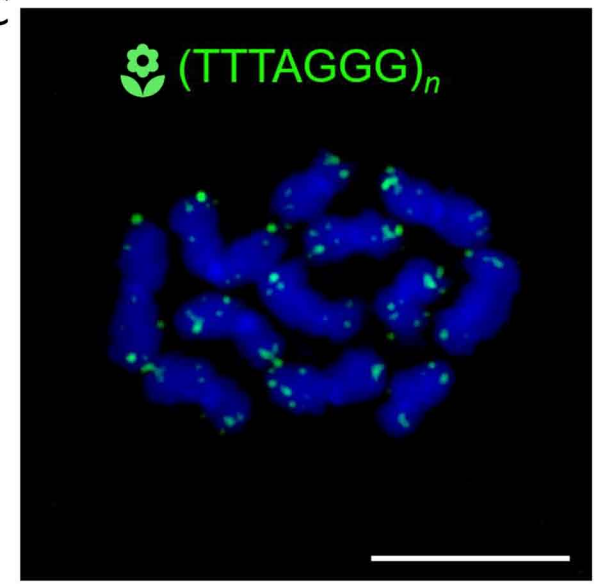

D

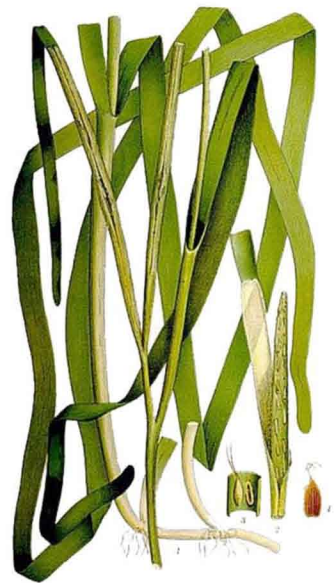

*Zostera marina*

E

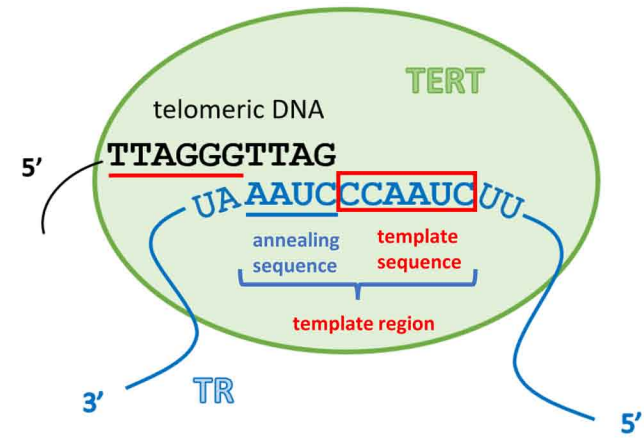

F

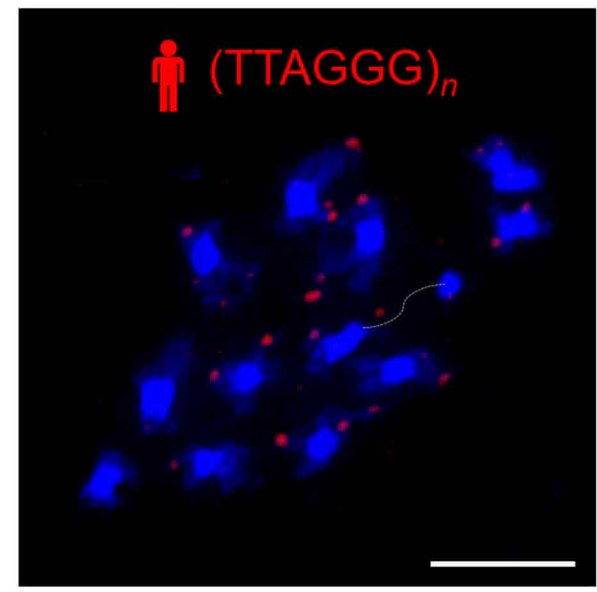

*Zostera noltii*

*Zostera marina*

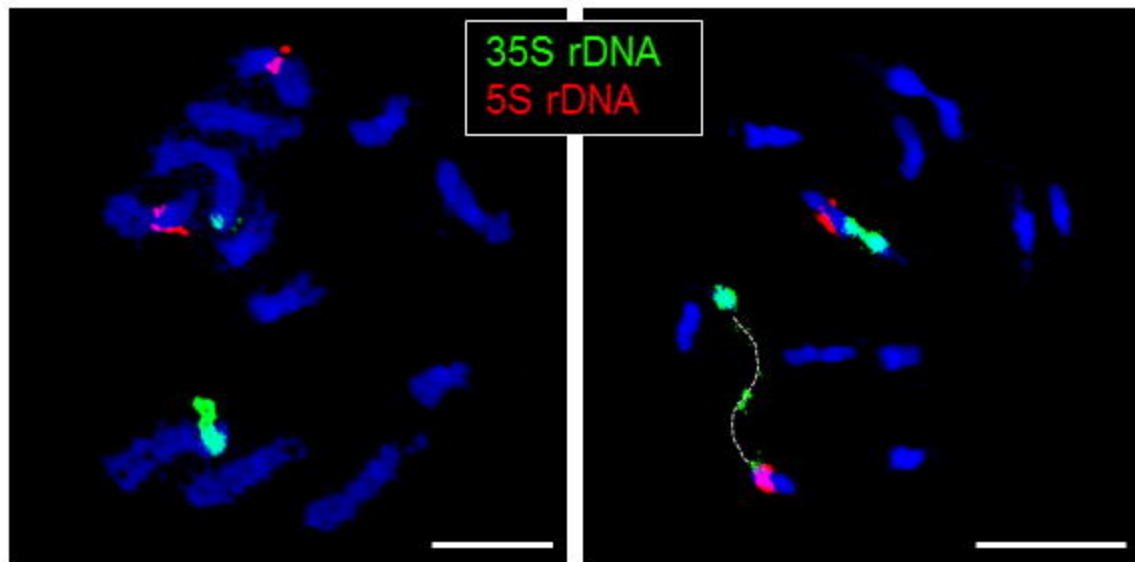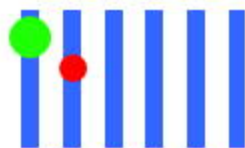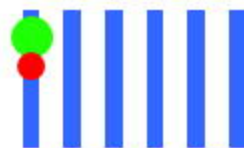

**A**

|                             |                    |        |
|-----------------------------|--------------------|--------|
| <i>Lemna minor</i> TR1      | TGAGTAAACCCTAAACC  | GTACT  |
| <i>Lemna minor</i> TR2      | TGGTTAAACCCTAAACC  | GTACT  |
| <i>Posidonia oceanica</i>   | TGCTCAAACCCTAAACT  | TTTCCT |
| <i>Spirodela polyrhiza</i>  | CCGATAAACCCTAAACC  | TGACT  |
| <i>Zostera muelleri</i> TR1 | GGATTAAACCCTAAACCA | AACTT  |
| <i>Zostera muelleri</i> TR2 | GATTAGAACCCCTAAACC | TACTT  |
| <i>Zostera capensis</i>     | GATTAGAACCCCTAAACC | TACTT  |
| <i>Zostera noltii</i>       | GATTAGAACCCCTAAACC | TACTT  |
| <i>Zostera marina</i> TR1   | TATTCTAACCCCTAAATA | CTTCT  |
| <i>Zostera marina</i> TR2   | TATACTAACCCCTAAATT | CTCCT  |

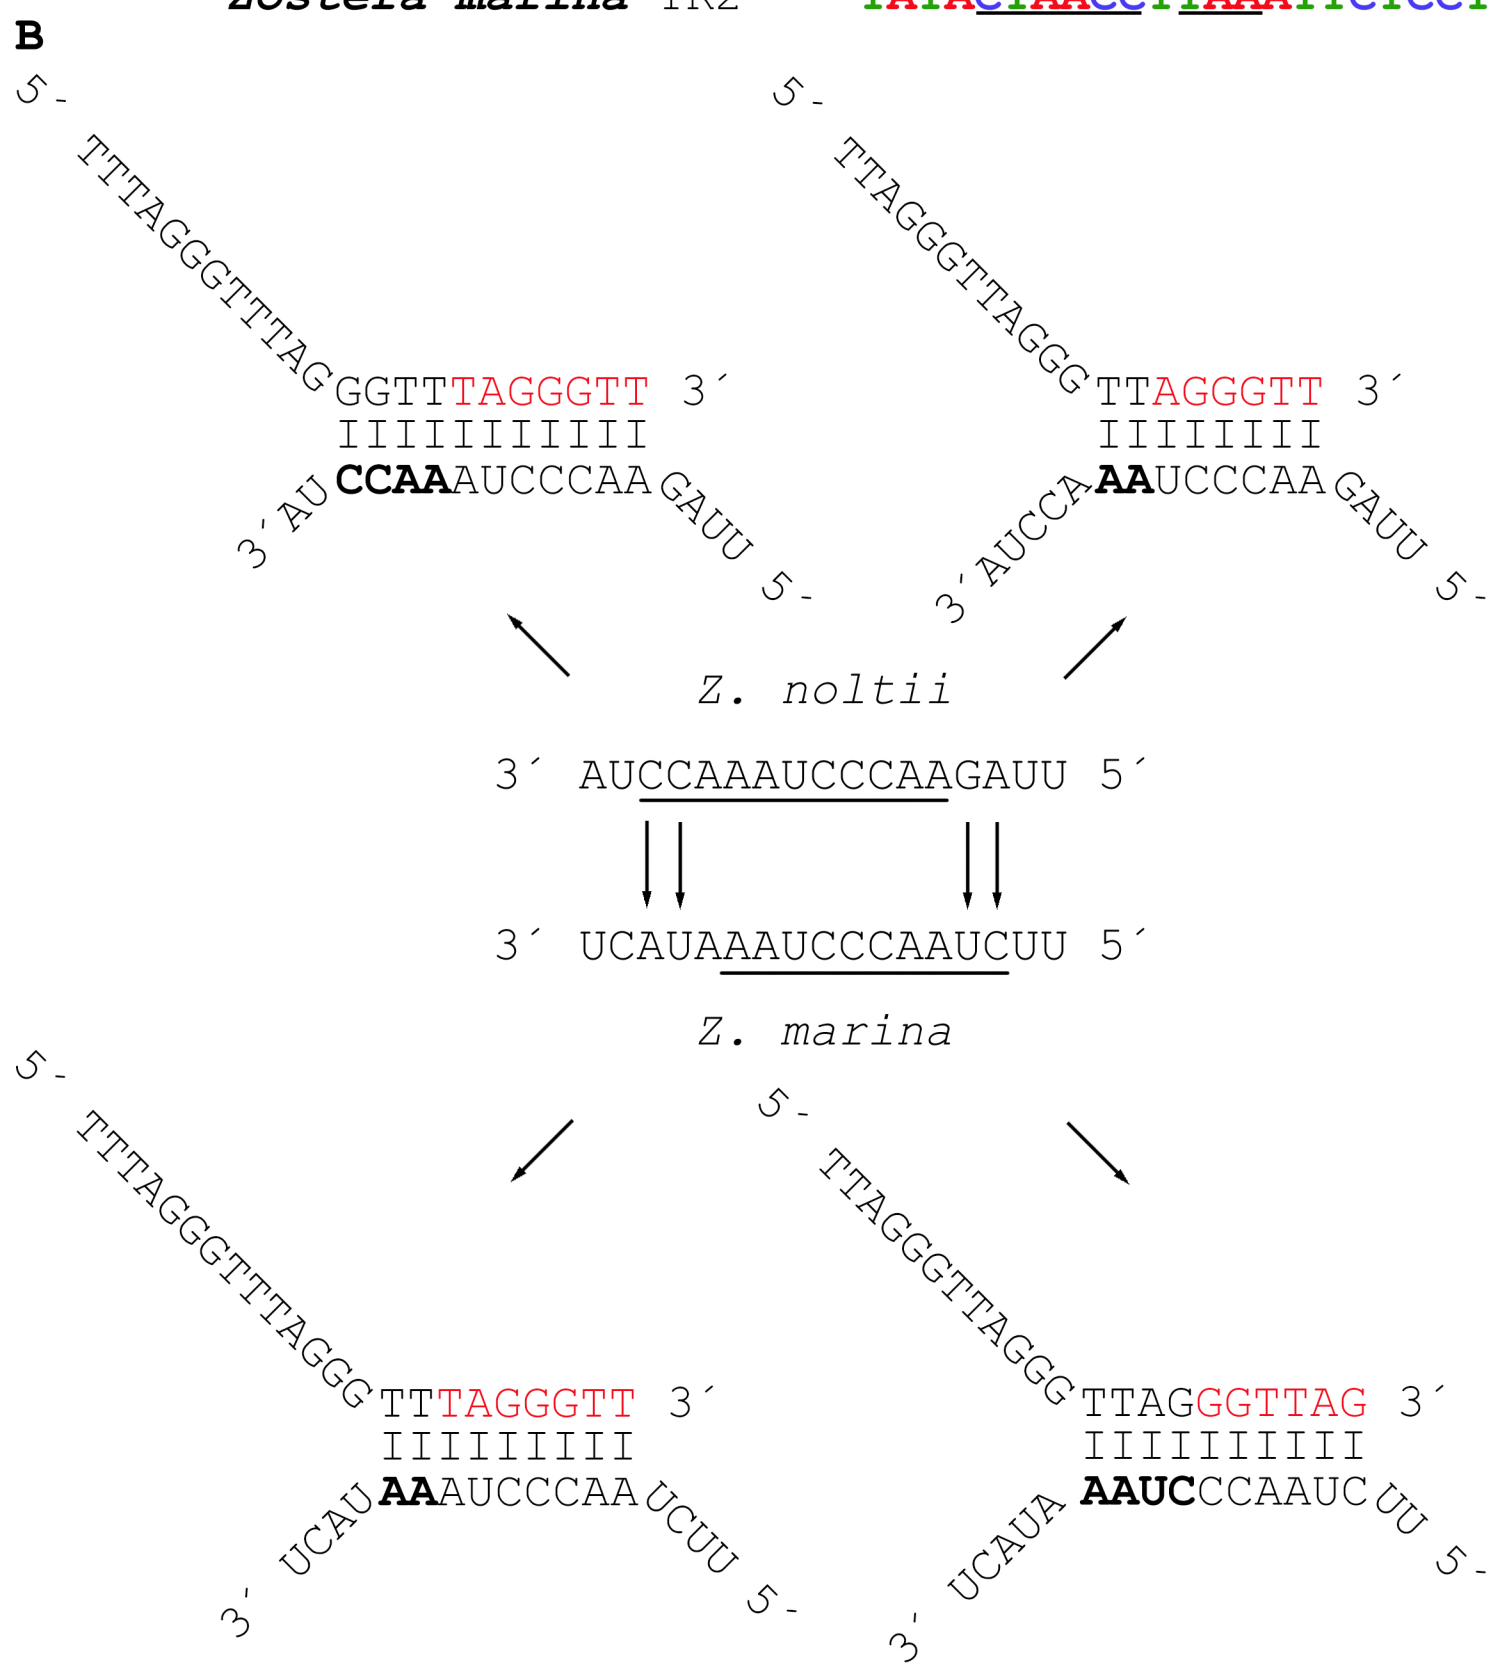

bioRxiv preprint doi: <https://doi.org/10.1101/2020.03.11.987156>; this version posted March 12, 2020. The copyright holder for this preprint (which was not certified by peer review) is the author/funder. All rights reserved. No reuse allowed without permission.

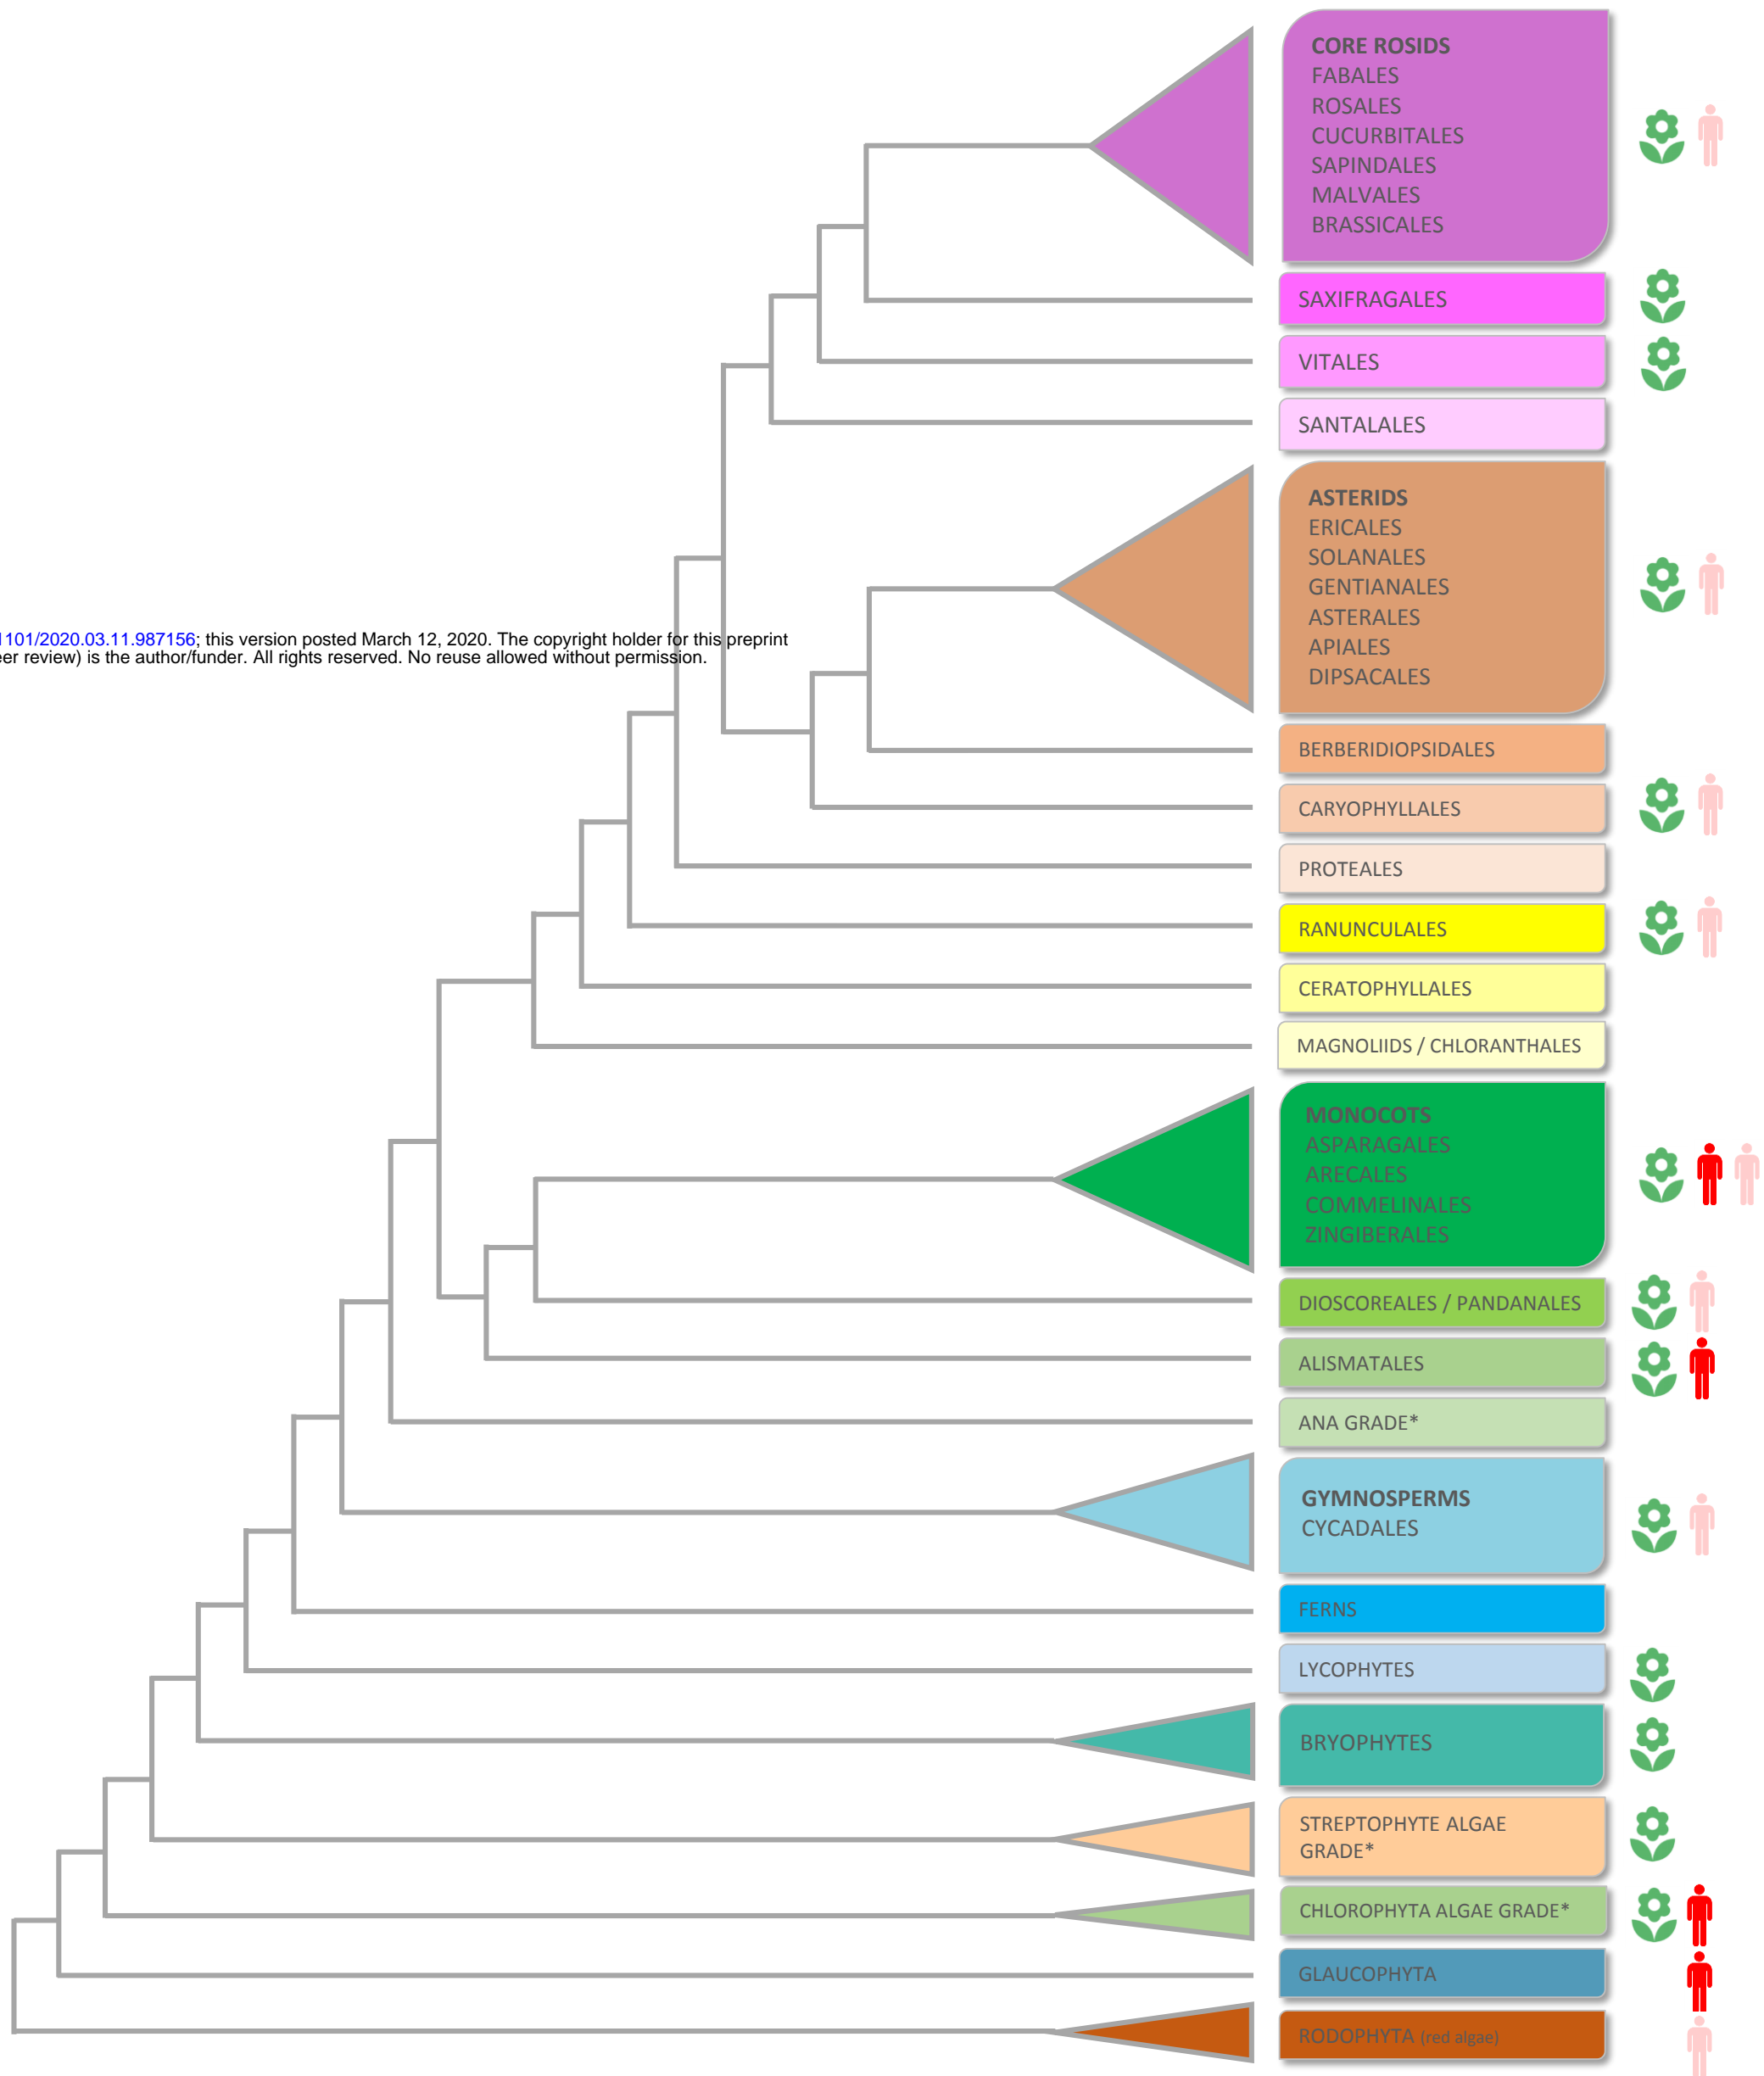

Source: https://www.biorxiv.org/content/10.1101/2020.03.11.987156v1.full.pdf
